# Supplementary material for: Advancing the integration of spatial data to map human and natural drivers on coral reefs
Source: PubMed Central journal article supplement (PMC5832214; doi:10.1371/journal.pone.0189792), 2018-03-01
Supplement: pone.0189792.s001.pdf [file pone.0189792.s001.pdf]

1 ***SUPPLEMENT S1***

2 ***Data analysis, assumptions and limitations***

3 ***Fisheries Catch***

4           The accessibility model in this study assumes all nearshore habitat is equal and that  
5 fisherman do not preferentially target areas with higher quality habitat or higher fish biomass.  
6 The relative weighting across different shoreline accessibility classes is guided by expert input,  
7 but no quantitative information exists to directly inform the models. Potential improvements to  
8 the fisheries catch model could incorporate travel time to boat harbors and ramps (as in [1]) in  
9 addition to surrounding population density, as well as statistics on the average number of boats  
10 using each facility per year (info for the latter currently does not exist). Wave exposure is an  
11 important seasonal component to shoreline and boat accessibility and this was not accounted for  
12 in our effort to map shore-based and boat-based fish catch. However, information on seasonal  
13 catch was unavailable and it is unknown whether average annual catch on northern exposed  
14 shores would be lower because of this temporal exclusion. In addition, if fishing increases on  
15 north facing shores during the summer months when the waters are calm, there may be no net  
16 effect on annual fisheries catch. In this study, it was assumed that greater fisheries catch was  
17 characteristic of more accessible fishing areas, but there are cases that may not satisfy this  
18 assumption. For example, a remote fishing grounds where additional effort is placed towards  
19 access because the CPUE is high could possibly have higher than predicted annual catch. Kīholo  
20 Bay on Hawai‘i Island is one example where our maps underestimated catch compared to a creel  
21 survey. Alternatively, highly accessible but overfished locations are present throughout the state  
22 where our maps overestimate annual catch (e.g., south shore Oahu). We accounted for spatial  
23 fishery management to the greatest extent possible, but limitations stem from discrepancies

24 between gear- and species- specific regulations and the gear groupings for which catch estimates  
25 were available (line, net, and spear). Areas where an entire gear group is completely prohibited  
26 were set to zero catch (assuming 100% compliance with regulations). However, areas with  
27 regulations on specific gears within a gear group or certain species could not be accounted for.  
28 For example, there are areas where lay nets are banned but thrownets and other types of nets area  
29 allowed, and there are marine managed areas where line fishing is allowed but the type and  
30 number of lines is restricted. Similarly, there are managed areas that do not restrict any gears but  
31 limit or prohibit take of certain species. To more accurately reflect all the nuances of fishery  
32 management in maps of catch, estimates by more specific gears and by species would be needed.  
33 While McCoy [2] presents species level estimates we did not have access to these at the time of  
34 model development, and there are relatively few areas in the MHI with species-specific  
35 prohibitions.

36         Despite these limitations, we were able to successfully validate the maps of non-  
37 commercial catch with the limited amount of creel survey information that exists (Table A;  
38 Figure A). The intricate methodology developed to map non-commercial fishing was vetted with  
39 DAR and NOAA resource experts on multiple islands throughout the process. In addition, the  
40 final non-commercial reef fish fisheries maps were validated with estimates of non-commercial  
41 catch at seven sites across the state where creel surveys have been conducted. The successful  
42 validation of the fishing layer developed for this project underscores the usefulness of this  
43 dataset as a stand-alone product for future research applications like exploring intra-island  
44 patterns in reef fish biomass to better direct fisheries management and enforcement resources.

45  
46

47 *Land-based Stressors*

48 We used the outputs from Falinski's [3] modified InVEST Sediment Delivery Ratio  
49 (SDR) estimates of sediment export across the Main Hawaiian Islands. The InVEST SDR has  
50 shown to be sensitive to the scale of the input data, but with calibration has successfully predicted  
51 sediment export across a range of climatic conditions[4]. Although the model was calibrated to  
52 total export, the processes modeled only capture hillslope erosion, and do not represent  
53 contributions from mass wasting, gully erosion and streambank erosion. In particular, areas that  
54 were once dominated by monocultures of sugarcane or pineapple have contributed to build-up of  
55 fine sediment along the banks of gulches and channels that takes decades and centuries to export  
56 via bank erosion [5]. Additionally, in highly degraded areas like Kaho'olawe or northeastern  
57 Lāna'i, decades of overgrazing have left gullied surfaces eroded to the bedrock that would not be  
58 well represented by the model. Lastly, the model input for forest type is "Evergreen Forest", which  
59 does not distinguish between healthy native forests (for instance northeast Maui), or forests  
60 dominated by invasive species (such as windward O'ahu). Further work that correlates forest  
61 disturbance to erosion rates would assist in refining the model estimates of sediment.

62 Our study spatially modeled the dispersion of sediment loads offshore by using a relatively  
63 simple kernel function. Wave action, currents, and resuspension are all important factors in  
64 sediment impacts on reefs. One limitation of the ocean circulation models available in coastal  
65 Hawaiian waters was the lack of models at the appropriate spatial and temporal scales to  
66 incorporate dispersal by dominant current direction. As new data becomes available this will be  
67 an important future step for improving the mapping of sediment dispersal offshore.

68 The key limitation for the nutrient layer is that it only considers on-site waste disposal and in  
69 many watersheds, agriculture, pastures, golf courses and injection wells also contribute to the

70 nutrient loads. In fact, preliminary analyses suggest that cesspools are only 25% of the total  
71 nutrient budget in groundwater. The estimated values of nitrogen flux and phosphorous flux were  
72 based on Tax Map Key parcels with onsite waste disposal systems. Nutrients from municipal  
73 treatment plants and injection wells were not captured here due to data limitations, nor were  
74 nutrients from surface runoff and infiltration (e.g., from fertilizer and animal waste). Expanded  
75 data on all land-based pollution sources would improve estimates of the total loads reaching  
76 coral reefs. Similar to the sediment load layer improvement, better modeling of nearshore  
77 circulation and biogeochemical processes could greatly improve the final product.

#### 78 *Invasive species*

79 The map outputs of invasive fish and algae are presence-only, as the status in un-surveyed  
80 areas is unknown and there is the potential that a survey failed to observe an invasive species where  
81 it is actually present. While large gaps exist, they do not necessarily indicate that these species are  
82 absent from those areas but instead could indicate that no data exists, or species were not recorded  
83 on existing transect data. For example, the northern tip of Oahu (Kahuku / Turtle bay) is a gap in  
84 monitoring data but the North east side (Kahana to Lā'ie) has fairly good data coverage with no  
85 recorded sightings of invasive species. Future work could try to map abundance of invasive species  
86 but would need to clearly distinguish which areas there are no data vs areas with confirmed absence  
87 of invasives.

#### 88 *Habitat degradation*

89 A caveat in the habitat degradation spatial layer is that structures that have been around for  
90 100+ years (e.g., fishpond walls) and have cultural value, are not differentiated in the source data  
91 from new structures (e.g., a seawall or pier) constructed in the last decade. In addition, there may  
92 be different ecological impacts from different types of habitat modification – a seawall vs dredging

93 – but this study combined them based on our definition of habitat modification as the alteration or  
94 removal of geomorphic structure as a result of human use.

95

96 ***Limitations and caveats with environmental driver data***

97 *Sea Surface Temperature (SST)*

98 Three SST datasets are concatenated to provide continuous, gap-free ocean temperature  
99 data from 1985 - 2013. The dataset concatenation applied a bias adjustment, derived from linear  
100 regression to the overlapping periods of each of the data sets. The following represent the  
101 analysis steps:

102 Step 1: Production of weekly composite, gap-filled SST data from the NOAA Pathfinder  
103 v5.2 SST 1/24° (~4 km), daily dataset for each location. This dataset covers the period January  
104 1985 – December 2012 at the native spatial resolution (i.e., ~4 km).

105 Step 2: Production of weekly composite SST data from NOAA’s Center for Satellite  
106 Applications and Research blended SST 0.1° (~11 km), daily dataset. This dataset covers the  
107 period February 2009 – October 2013 at the native spatial resolution (i.e., ~11 km).

108 Step 3: Production of weekly composite SST data from NOAA’s Center for Satellite  
109 Applications and Research blended SST 0.05° (~5 km), daily dataset. This dataset covers the  
110 period March 2012 – December 2014 at the native spatial resolution (i.e., ~5 km).

111 Step 4: Using the overlap period between datasets, we linearly regress paired (in time)  
112 data to determine the bias between datasets for each location. We then bias-adjust the datasets to  
113 represent the 5 km dataset and blend the datasets through overlap periods to complete a single  
114 SST time series dataset covering 1985 – 2013 for each location.

115

116 *Chlorophyll-a and Irradiance*

117 Satellite-derived ocean color algorithms are calibrated for optically-deep waters, where  
118 the signal received by the satellite sensor originates from the water column without any bottom  
119 contribution. In our study region, optically-deep waters are typically deeper than 30 m[6]. In  
120 optically-shallow waters such as lagoons, regions within atolls, and most coral reef  
121 environments, bottom substrate properties and sediment suspension may affect light propagation,  
122 which increases marine reflectance and data quality issues when quantifying in-water  
123 constituents, such as chlorophyll-*a* [7].

124 Satellite-derived irradiance, specifically photosynthetically available radiation (PAR;  
125 defined as downwelling irradiance between 400 and 700 nm), is subject to similar data quality  
126 concerns. The data production algorithm[8], in addition to a number of other quality control  
127 steps, incorporates irradiance attenuation in the overall calculation of irradiance. Attenuation  
128 sources in the atmosphere include the absorption and scattering of irradiance as a result of  
129 concentrations of ozone, water vapor, and aerosols. Attenuation sources at the air-sea interface  
130 include reflection, associated with surface properties such as sea-surface roughness and levels of  
131 sea foam [8]. Optically-shallow areas are often wrongly interpreted as irradiance attenuation  
132 sources, thereby leading to spuriously low irradiance values [8].

133 Taking into account the data-quality concerns described above, we developed a multistep  
134 masking routine to remove contaminated data pixels (sensu [9]). We used the 30-m contour as  
135 the cutoff for satellite pixel inclusion; all pixels inshore of the 30-m isobath were identified and  
136 removed from the data set prior to analysis. This step, however, is not sufficient to ensure error-  
137 free chlorophyll-*a* and irradiance data sets, because pixels outside the 30-m isobath may still  
138 contain biased information associated with optically-shallow waters. This occurs because data

139 pixels are box-like in shape and are georeferenced at their center point; thus, information  
140 contributing to any single pixel value is collected up to one-half a pixel diagonal distance away.  
141 To address this, we created a data exclusion zone of one-half a pixel diagonal in length ( $0.0295^\circ$   
142 or  $\sim 3.27$  km) everywhere perpendicular to the 30-m isobath, with all pixels on or within this  
143 zone also removed from the data set.

#### 144 *Wave Power*

145 Small-scale nearshore processes and rapid changes in wave refraction, amplification and  
146 dissipation were poorly resolved in the University of Hawai'i's wave model, resulting in  
147 anomalously high wave forcing values along the coastline. As such, we removed the nearest  
148 wave model pixels to shore, or all pixels 500 m or closer to shore across all islands. Therefore,  
149 actual wave power values presented herein are likely a conservative estimate of the actual wave  
150 forcing experienced across the Hawaiian Islands. For wave model assumptions and limitations,  
151 please see Li et al. [10].

152

153 **Table A. Creel survey data sources:**  
 154

| Location   | Island  | Survey Period   | duration      | Type         | Citation |
|------------|---------|-----------------|---------------|--------------|----------|
| Hanalei*   | Kaua'i  | 6/1992-12/1993  | 1 year, 4 mo. | Final Report | [11]     |
| Waikiki*   | O'ahu   | 6/1998-8/2001   | 1 year, 2 mo. | Dissertation | [12]     |
| Kahekili   | Maui    | 1/2011-12/2011  | 1 year        | Final Report | [13]     |
| Wailuku    | Maui    | 3/2013 - 5/2014 | 1 year        | Final Report | [14]     |
| Maunalei** | Lāna'i  | 5/2013 - 6/2013 | 2 weeks       | Frame Survey | [15]     |
| Kaupulehu  | Hawai'i | 8/2013-8/2014   | 1 year        | Final Report | [16]     |
| Kiholo     | Hawai'i | 5/2012-5/2013   | 1 year        | Publication  | [17]     |

155

156

157 **Figure A. Fisheries catch mapping validation.** Scatter plot of annual catch estimates from  
 158 creel surveys on the y-axis vs. annual catch of reef fish for corresponding locations from the  
 159 noncommercial shore-based total catch map layer on the x-axis. The grey dashed line has a slope  
 160 of one - a point falling on this line would indicate a perfect match. The solid black line is a fitted  
 161 linear regression with intercept anchored at (0,0) ( $p < 0.01$ ).  $R^2$  and slope of line are reported on  
 162 the graph.

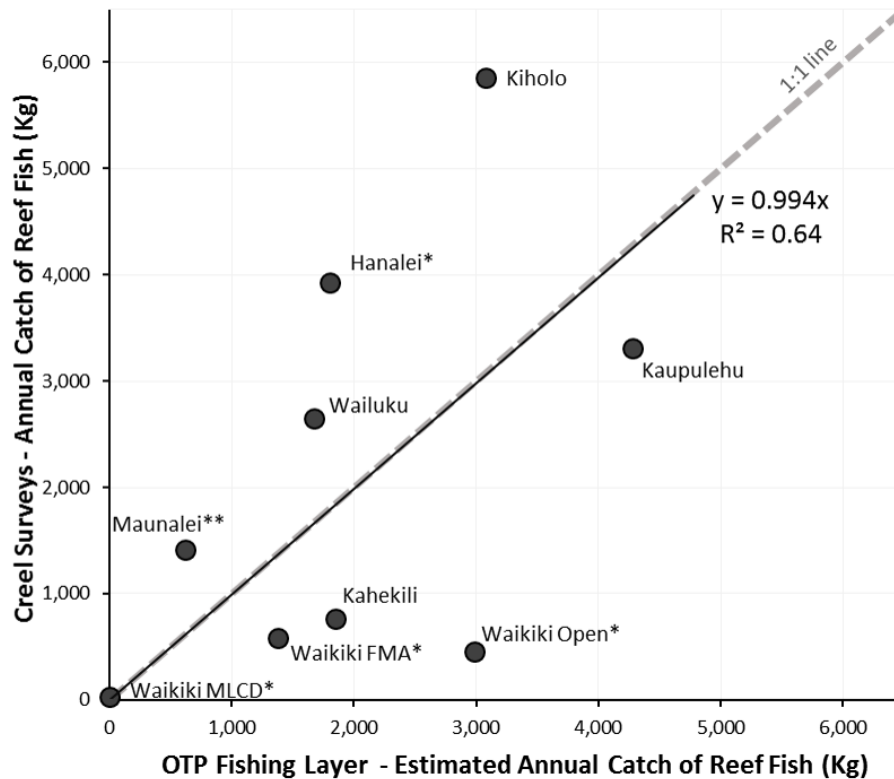

163

164 \* creel surveys conducted outside the time frame of Marine Recreational Information Program  
 165 (MRIP) data used to derive statewide fishing layer (2004 – 2013)

166 \*\* data for Maunalei is from a two week frame survey, not a full creel survey

167



168 **References:**

169

- 170 1. Cinner JE, Huchery C, MacNeil MA, Graham NAJ, McClanahan TR, Maina J, et al.  
171 Bright spots among the world’s coral reefs. *Nature*. 2016;535. doi:10.1038/nature18607
- 172 2. McCoy KS. Estimating Nearshore Fisheries Catch for the Main Hawaiian Islands.  
173 University of Hawaii at Manoa - M.S. Thesis. 2015.
- 174 3. Falinski KA. Predicting sediment export into tropical coastal ecosystems to support ridge  
175 to reef management. University of Hawaii at Manoa - Ph.D. Dissertation. 2016.
- 176 4. Hamel P, Falinski K, Sharp R, Auerbach DA, Sánchez-Canales M, Dennedy-Frank PJ.  
177 Sediment delivery modeling in practice: Comparing the effects of watershed  
178 characteristics and data resolution across hydroclimatic regions. *Sci Total Environ*.  
179 2017;580: 1381–1388. doi:10.1016/j.scitotenv.2016.12.103
- 180 5. Stock JD, Falinski KA, Callender T. Reconnaissance sediment budget for selected  
181 watersheds of West Maui, Hawai ‘i. US Geological Survey; 2016.
- 182 6. Mumby PJ, Skirving W, Strong AE, Hardy JT, LeDrew EF, Hochberg EJ, et al. Remote  
183 sensing of coral reefs and their physical environment. *Mar Pollut Bull*. 2004;48: 219–228.  
184 doi:10.1016/j.marpolbul.2003.10.031
- 185 7. Boss E, Zaneveld JR V. The effect of bottom substrate on inherent optical properties:  
186 Evidence of biogeochemical processes. *Limnol Oceanogr*. 2003;48: 346–354.  
187 doi:10.4319/lo.2003.48.1\_part\_2.0346
- 188 8. Carder KL, Chen FR, Hawes SK. Instantaneous photosynthetically available radiation and  
189 absorbed radiation by phytoplankton. NASA Ocean Color web page. 2003; 1–24.  
190 Available: [https://modis.gsfc.nasa.gov/data/atbd/atbd\\_mod20.pdf](https://modis.gsfc.nasa.gov/data/atbd/atbd_mod20.pdf)
- 191 9. Gove JM, Williams GJ, McManus MA, Heron SF, Sandin SA, Vetter OJ, et al.  
192 Quantifying Climatological Ranges and Anomalies for Pacific Coral Reef Ecosystems.  
193 *PLoS One*. 2013;8. doi:10.1371/journal.pone.0061974
- 194 10. Li N, Cheung KF, Stopa JE, Hsiao F, Chen YL, Vega L, et al. Thirty-four years of Hawaii  
195 wave hindcast from downscaling of climate forecast system reanalysis. *Ocean Model*.  
196 2016;100: 78–95. doi:10.1016/j.ocemod.2016.02.001
- 197 11. Friedlander AM, Parrish JD, Peterson JD. A survey of the Fisheries of Hanalei Bay,  
198 Kauai. Report to Hawaii Division of Aquatic Resources. Honolulu, HI; 1995.
- 199 12. Meyer CG. An Empirical Evaluation of the Design and Function of a small marine reserve  
200 (Waikiki Marine Life Conservation District). University of Hawaii, Ph.D. Dissertation.  
201 2003.
- 202 13. Friedlander AM, Koike H, Kekoa L, Sparks R. Design, development, and implementation  
203 of a survey of the fisheries of the Kahekili Herbivore Fisheries Management Area. Final  
204 Report to Hawaii Division of Aquatic Resources. 2012.
- 205 14. Koike H, Carpio J, Friedlander AM. Final Creel Survey Report for Wailuku Community  
206 Management Area , Maui County , Hawaii. Final Report to Conservation International.  
207 2014.

- 208 15. Koike H, Kaho'ohalahala S, Friedlander AM. Frame Creel Survey Report for Maunalei,  
209 Lanai. 2013.
- 210 16. Koike H, Wiggins C, Most R, Conklin E, Minton D, Friedlander A. Final Creel Survey  
211 Report for Ka'ūpūlehu Creel Survey Project, North Kona, Hawai'i Island. Final Report to  
212 The Nature Conservancy. 2015.
- 213 17. Kittinger JN, Teneva LT, Koike H, Stamoulis KA, Kittinger DS, Oleson KLL, et al. From  
214 reef to table: Social and ecological factors affecting coral reef fisheries, artisanal seafood  
215 supply chains, and seafood security. PLoS One. 2015;10: 1–24.  
216 doi:10.1371/journal.pone.0123856  
217
