# Supplementary material for: Advancing the integration of spatial data to map human and natural drivers on coral reefs
Source: PubMed Central journal article supplement (PMC5832214; doi:10.1371/journal.pone.0189792), 2018-03-01
Supplement: pone.0189792.s002.pdf [file pone.0189792.s002.pdf]

1 **SUPPLEMENT S2 - Detailed GIS Methods for Fisheries Catch Mapping**

2 The methodology developed for each fishing data layer is detailed below including the data  
3 sources and processing steps. All analysis was performed in ArcGIS 10.1 or R 3.1.x. All spatial  
4 data were projected to UTM zone 4 North, NAD 1983. All data layers use a common shoreline  
5 derived from NOAA Habitat Maps (from 2007 IKONOS imagery) and NOAA Continually  
6 Updated Shoreline Product (CUSP), with certain sections of coastline (e.g. Wai’opae Tide Pools)  
7 hand edited based on ESRI world imagery basemap and WorldView 2 imagery.

8 We used 2 primary sources of catch data as the basis for our fishing maps: Commercial marine  
9 landings (CML) data from the State of Hawaii Division of Aquatic Resources (DAR), and  
10 estimates of non-commercial catch from McCoy et al. (2017, in prep) derived from Marine  
11 Recreational Information Program (MRIP) data.

12

13 **Commercial Fishing**

14 Commercial catch data received from DAR spanned an 11-year period from 2003 through 2013  
15 and is aggregated by year, reporting block, gear, and species. DAR filters CML data before  
16 release such that reporting blocks with less than three fishers reporting are excluded, in order to  
17 protect fisher identities. It is not possible to explicitly distinguish between boat-based and shore-  
18 based fishing with the gear types reported in CML data. We filtered the data for reef fish species  
19 only (Table A), and calculated average annual catch in kilograms by reporting block and gear  
20 groupings that matched the MRIP data (line, net, and spear) (Table B). Spatial footprints of  
21 inshore commercial reporting blocks were obtained from the shapefile served on the Hawaii  
22 Statewide GIS Program website (<http://planning.hawaii.gov/gis/> ; filename: Fishchart2008.shp).

23 Annual catch values were joined to reporting blocks using the Area ID. Using the Polygon to  
24 Raster conversion tool, average annual commercial catch data was converted from polygon to  
25 raster with 100 m resolution for each gear type. Map pixels within marine protected areas that  
26 are full no-take, explicitly prohibit commercial fishing, or prohibit specific gear groupings, were  
27 set to zero respectively for each gear layer. Catch in Defacto MPAs and other areas with  
28 restricted access were reduced according to expert input and local knowledge. Next each map  
29 pixel was divided by the number of raster cells within each reporting block so that units are  
30 comparable to Non-Commercial fishing layers (kg/ha). The result assumes commercial catch is  
31 evenly distributed spatially across each reporting block.

32

### 33 **Non-Commercial Fishing**

34 McCoy et al. (2017, in prep) estimated average annual non-commercial catch of reef fish for the  
35 years 2004 – 2013 for the 6 most populated Main Hawaiian Islands (Kauai, Oahu, Molokai,  
36 Lanai, Maui, and Hawaii), by platform (boat, shore) and gear (line, net, spear). McCoy's  
37 estimates also represent catch of only reef fin fish. Many more reef fish species were recorded in  
38 MRIP data compared to CML – see McCoy (2015) for species lists and specific gears.

#### 39 *Shore-based fishing*

40 To quantify boat-based fishing at a within-island spatial resolution we combined MRIP estimates  
41 with two measures of shoreline accessibility (steepness and presence of roads), and gear specific  
42 footprints.

43 Slope of the shoreline was calculated in degrees using the USGS 10 m Digital Elevation Model  
44 (DEM). Then focal statistics was used to calculate the average slope within a 100 m radius of  
45 each pixel. Next the string of raster cells that fall along the coastline were extracted and  
46 reclassified into 3 categories (Table C). Exploration of the data showed that 0-3 degrees average  
47 slope characterize coastline that would be easily accessible to anyone, 3-20 degrees includes  
48 areas that are more difficult but possible to access and fish from, and average slope greater than  
49 20 degrees is very rugged coastline that is not possible to access and high cliffs that are too tall to  
50 fish off of (Fig A1).

51 Next, the coastal raster cells with associated slope information were converted from Raster to  
52 Point data and a Near Analysis was used to calculate the distance within 1 km to the nearest  
53 roads of various type. Topologically Integrated Geographic Encoding and Referencing (TIGER)  
54 road data from the US Census Bureau were used based on completeness compared to other road  
55 data available from the Hawaii Statewide GIS Program. TIGER roads are classified into 14 types  
56 of roads, which we further grouped into 3 classes: 1) paved public roads, 2) 4WD roads, and 3)  
57 private roads and foot trails (Private roads and foot trails were grouped into a single class  
58 because both are relatively rare across the dataset and both are believed to represent a much  
59 lower level of accessibility than public and 4WD roads). Coastal points were classified by  
60 presence and type of roads within distances of 100 m, 200 m, 500 m, and 1 km. Type of roads  
61 present were determined using a priority ranking based on ease of accessibility with paved public  
62 roads ranking highest, 4WD roads next, and private roads and foot trails ranked as lowest (Table  
63 D). For example, if all road types are present within 500 m of a point, that point would be  
64 assigned “paved public road” because that ranks highest in ease of accessibility, regardless of  
65 which road type was closest to the shore. Final map layers were created using the 500 m cutoff,

66 as this layer provided the most precise information without compromising our ability to make  
67 conclusions about this proxy for coastal access (Fig A2).

68 Attributes for slope and road accessibility were then combined into a single accessibility criteria.  
69 A weighting scheme was created that assumes easily accessible shorelines with flat slopes and  
70 paved public road access have the highest catch, and therefore the highest weight, and that catch  
71 and weight decreases incrementally with level of accessibility (Table E). Any combination that  
72 includes no accessibility due to steep slopes received a zero weight (and therefore zero fishing).  
73 Weights sum to 1. These weights were then multiplied by the MRIP island-scale estimates of  
74 annual catch at each coastal point, for each of the three shore-based gear types: line, net, spear.  
75 For Line fishing, catch was extended offshore a distance of 200 m. For Net fishing, catch was  
76 extended offshore to the 20 ft (6.1 m) depth contour, with a maximum distance from shore of 1  
77 km. For Spearfishing, a logistic decay function was used so catch decreases with depth to 40 m  
78 or a maximum distance of 2 km from shore (Fig B). The equation for spearfishing decay with  
79 depth is as follows:

$$80 \quad C_p = \frac{C_i}{1 + e^{(-0.26 \cdot (D+20))}}$$

81  
82 Where  $C_p$  is relative catch at a given pixel,  $C_i$  is the island-scale catch estimate weighted by  
83 shoreline accessibility, and  $D$  is depth in meters.

84

85 Next, Marine Managed Areas and de facto MPAs were accounted for by conducting a  
86 comprehensive review of regulations and boundaries. In full no-take MPAs catch by gear was set  
87 to zero and in other areas with restricted access catch was reduced according to expert input and  
88 local knowledge. Finally, pixel values were rescaled to be in units of kg/ha such that all cells

89 within an island's shore-fishing footprint sum to the value of the original MRIP island-scale  
90 estimate. Units, pixel size and grid alignment are consistent with all other fishing layers so that  
91 they can be compared directly or added together for various uses.

92

### 93 *Boat based fishing*

94 To quantify boat-based fishing at a within-island spatial resolution we combined MRIP estimates  
95 with distance from boat launches and a Gaussian decay function that assumed the majority of the  
96 catch occurs within 15 – 20 km of each harbor (Fig A3). Additionally, we weighted boat harbors  
97 by the human population present within 30 km, and accounted for marine managed areas and  
98 restricted access areas (de facto MPAs e.g. Military Danger Zones). First, point data for boat  
99 harbors and launch ramps were combined from two datasets available from the Hawaii Statewide  
100 GIS Program website (filenames: Harbors.shp and BoatingFacilities.shp). Data were checked for  
101 quality and updated as necessary to ensure only operational boat harbors and launch ramps were  
102 included, and geographic positions were accurate. Anchorages, fishing piers, historic, and  
103 disused ramps/harbors were removed prior to analysis.

104 Boat facility weighting factors were calculated based on total human population within 30 km of  
105 each boat harbor or ramp. Human population was mapped based on 2010 census data and  
106 LANDFIRE land use/land cover data using the USGS Dasymetric Mapping Tool to gain a more  
107 accurate representation of population distribution. A 30 km buffer was then created around each  
108 boating facility and the Zonal Statistics tool was used to sum the human population within each  
109 buffer. These population values were then used to assign weights to each boating facility in order

110 to allocate a proportion of total island catch estimates to each boat harbor or ramp (more  
111 described below). These weights sum to 1 for each island.

112 Next, boating facility cost allocation footprints were created by calculating distance to boating  
113 facility using the Cost Allocation tool iteratively for each boat harbor/ramp, with a maximum  
114 distance of 80 km. This allows for fishing influence from one harbor to overlap with nearby ones  
115 as well as with neighboring islands. A cost surface was created by converting island polygons to  
116 a 100 m raster with land pixels assigned a value of 1,000,000, and ocean pixels a value of 1.  
117 During rasterization, priority was set in the Polygon to Raster tool for ocean areas - this ensures  
118 that boating facility points do not fall on land. The cost distance surface output shows the  
119 distance from the nearest ramp/harbor to a given pixel without traveling over land. The resulting  
120 raster was then clipped to the footprint of inshore commercial reporting blocks.

121 In order to allocate catch proportionally to each boat harbor/ramp, estimated annual catch at the  
122 island scale and the human population based weighting factors were joined to the attribute table  
123 of each boating facility's cost allocation footprint, and used in a Gaussian decay function with  
124 each distance surface. The equation for the decay function is as follows:

$$125 \quad C_p = C_i \cdot e^{\left(\frac{-1 \cdot d^2}{10^9}\right)}$$

126

127 Where  $C_p$  is the relative catch at a given map pixel,  $C_i$  is the island-scale catch estimate, and  $d$  is  
128 distance to boat harbor in meters (Fig A3).

129

130 This decay function assumes the majority of catch occurs within 15-20 km of a harbor or ramp  
131 and declines more rapidly beyond that. Catch in full no-take MPAs, and marine managed areas

132 that prohibit boats or entire gear groups were set to zero respectively for each gear specific layer.  
133 Other areas with restricted access were reduced according to expert input and local knowledge.  
134 Pixel values within each boating facility's footprint were then rescaled such that the sum in each  
135 footprint was equal to the respective boat facility's weighting factor times the MRIP catch  
136 estimate for that island in units of kg per pixel (kg/ha). Finally, all raster layers for each boat  
137 harbor/ramp were summed together using the Cell Statistics tool.

138 Final pixels values are in units of kg / ha such that the sum of all pixels for each island is equal to  
139 the original MRIP island-scale estimate. The spatial footprint for boat-based layers is the same as  
140 inshore reporting blocks for commercial catch. Units, pixel size and grid alignment are consistent  
141 with all other fishing layers so that they can be compared directly or added together for various  
142 uses.

143

144

145 **Tables and Figures**

146 **Table A.** All species reported in commercial catch data (CML) and the classification used to  
 147 filter data to only reef finfish species.

| <b>Reef Species</b> | <b>Reef Spp. (cont'd)</b> | <b>Non-reef Species</b> | <b>Non-Reef Spp. (cont'd)</b> |
|---------------------|---------------------------|-------------------------|-------------------------------|
| Aawa                | Munu                      | Aku                     | Ogo                           |
| Ahaaha              | Naenae                    | Akule                   | Onaga                         |
| Aholehole           | Nenue                     | Alfonsin                | Ono                           |
| Alaihe              | Nohu                      | Aweoweo (deepsea)       | Opakapaka                     |
| Alaihe mama         | Nunu                      | Bigeye tuna             | Opelu                         |
| Amaama              | Oio                       | Billfish-misc.          | Opihi alinalina               |
| Api                 | Olililepa                 | Black coral             | Opihi makaiauli               |
| Awa                 | Omaka                     | Black marlin            | Peles murex                   |
| Awaawa              | Omilu                     | Blue marlin             | Sailfish                      |
| Aweoweo             | Opelu kala                | Day tako                | Samoan crab                   |
| Black kole          | Pakuikui (tang)           | Ehu                     | Shark-misc.                   |
| Butaguchi ulua      | Palani                    | Gaskoins cowry          | Short-nosed spearfish         |
| Dobe ulua           | Panuhunu                  | Gindai                  | Spiny green lobster           |
| Ea (wrasse)         | Panunu                    | Golden kali             | Spiny red lobster             |
| Guncan ulua         | Paopao ulua               | Granulated cowry        | Striped marlin                |
| Hahalalu            | Papa ulua                 | Hapuupuu                | Swordfish                     |
| Hinalea             | Poopaa                    | Hee (octopus)           | Thresher shark                |
| Humuhumu            | Pualu                     | Hogo                    | Tiger shark                   |
| Kagami ulua         | Puhi eel-misc.            | Kahala                  | Tilapia                       |
| Kaku                | Puhi white                | Kalekale                | Tombo                         |
| Kala                | Roi                       | Kamanu                  | Tuna-misc.                    |
| Kawelea             | Sasa ulua                 | Kawakawa                | Walu                          |
| Kole                | Taape                     | Keokeo                  | Yellowfin tuna                |
| Kumu                | Toau                      | Kona crab               | Yellow-tail kali              |
| Kupipi              | Uhu parrot-misc.          | Kuahonu crab            |                               |
| Lae                 | Uku                       | Laevigatus shrimp       |                               |
| Laenihi             | Ulua-misc.                | Lehi                    |                               |
| Maiko               | Umaumalei                 | Limu kohu               |                               |
| Malu                | Uouoa                     | Limu wawaeiole          |                               |
| Manini              | Wahanui                   | Limu-misc.              |                               |
| Maomao              | Weke                      | Mahimahi                |                               |
| Menpachi            | Weke aa                   | Mako                    |                               |
| Moana               | Weke nono                 | Miscellaneous           |                               |
| Moana kale          | Weke pueo                 | Monchong                |                               |
| Moi                 | Weke ula                  | Muhee (squid)           |                               |
| Mu                  | White ulua                | Oceanic whitetip        |                               |



149 **Table B.** Gear types reported in CML data and their corresponding classification to match with  
 150 MRIP gears. \*Asterisks indicate gears for which there is zero catch after filtering the species to  
 151 only reef fish.

| <b>CML Method</b> | <b>MRIP Equivalent</b> |     | Additional notes:                                                      |
|-------------------|------------------------|-----|------------------------------------------------------------------------|
| Aku boat*         | Line                   |     | - Kaka line - only one block reporting (300lbs of Menpachi)            |
| Casting           | Line                   |     | - Tuna HL catch of reef fish was almost 100% Uku                       |
| DSHL              | Line                   |     | - Line gears: Dominant species reported were Uku, Menpachi, and Taape  |
| ISHL              | Line                   |     | - Dive/Spear: dominant catch is Uhu                                    |
| Kaka line         | Line                   |     | - Net: dominant catch is Manini, Aholehole, and Weke ula               |
| Shortline*        | Line                   |     | - Trap fishing only reported on Oahu (dominant catch = Uhu and Palani) |
| Troll             | Line                   |     |                                                                        |
| Tuna HL           | Line                   |     |                                                                        |
| Vertical line*    | Line                   |     |                                                                        |
| Net               | Net                    | 152 |                                                                        |
| Dive/spear        | Spear                  | 153 |                                                                        |
| Other*            | Other                  |     |                                                                        |
| Trap              | Other                  | 154 |                                                                        |
| Handpick*         | Other                  | 155 |                                                                        |

156

157

158 **Table C.** Shoreline accessibility in term of shoreline steepness, calculated as the average slope  
 159 within 100m inland of the shoreline.

| <b>Accessibility</b> | <b>Slope</b> |
|----------------------|--------------|
| High accessibility*  | 0 – 3 °      |
| Low accessibility*   | 3 -20 °      |
| No accessibility     | > 20 °       |

160 \*3° slope over 100m ≈ elevation gain of 5 m (17 ft)

161 \*20° slope over 100m ≈ elevation gain of 36 m (120 ft)

162

163

164

165 **Table D.** Shoreline Accessibility by type of road within 500m of coastline.

| <b>Accessibility</b> | <b>Road Type</b>     |
|----------------------|----------------------|
| High accessibility   | Paved Public Roads   |
| Less accessibility   | 4WD roads            |
| Least accessibility  | Private road or foot |
| No accessibility     | None                 |

166

167

168 **Table E.** Weighting scheme for shore based fishing, combining shoreline steepness and type of  
169 road near the shoreline. Weights sum to 1.

|                     |      | <b>Road within 500m of shore</b> |          |         |      |
|---------------------|------|----------------------------------|----------|---------|------|
|                     |      | Paved Public                     | 4WD Road | Private | none |
| <b>Slope Access</b> | High | 0.4                              | 0.15     | 0.05    | 0.02 |
|                     | Low  | 0.25                             | 0.1      | 0.025   | 0.01 |
|                     | none | 0                                | 0        | 0       | 0    |

170 **Figure A.** Intermediate  
 171 data derived in  
 172 development of non-  
 173 commercial fisheries catch  
 174 layers. (1) Map of shoreline  
 175 accessibility based on the  
 176 average slope of the  
 177 shoreline calculated from  
 178 USGS 10 m DEM and  
 179 classified into three  
 180 accessibility categories:  
 181 high accessibility (e.g., flat,  
 182 sandy beach environment),  
 183 low accessibility (e.g.,  
 184 rugged coastal environment  
 185 with intermediate access),  
 186 and no accessibility (e.g.,  
 187 high sea cliffs with no  
 188 access).  
 189 (2) Map showing presence  
 190 of roads within 500 m of  
 191 the shoreline by type of  
 192 road calculated using US  
 193 Census Bureau TIGER line  
 194 data.  
 195 (3) Map showing the over-  
 196 water distance to active  
 197 boat harbors and launch  
 198 ramps with inset graph of  
 199 the Gaussian decay  
 200 function applied in order to  
 201 approximate boat-based  
 202 fishing intensity.  
 203

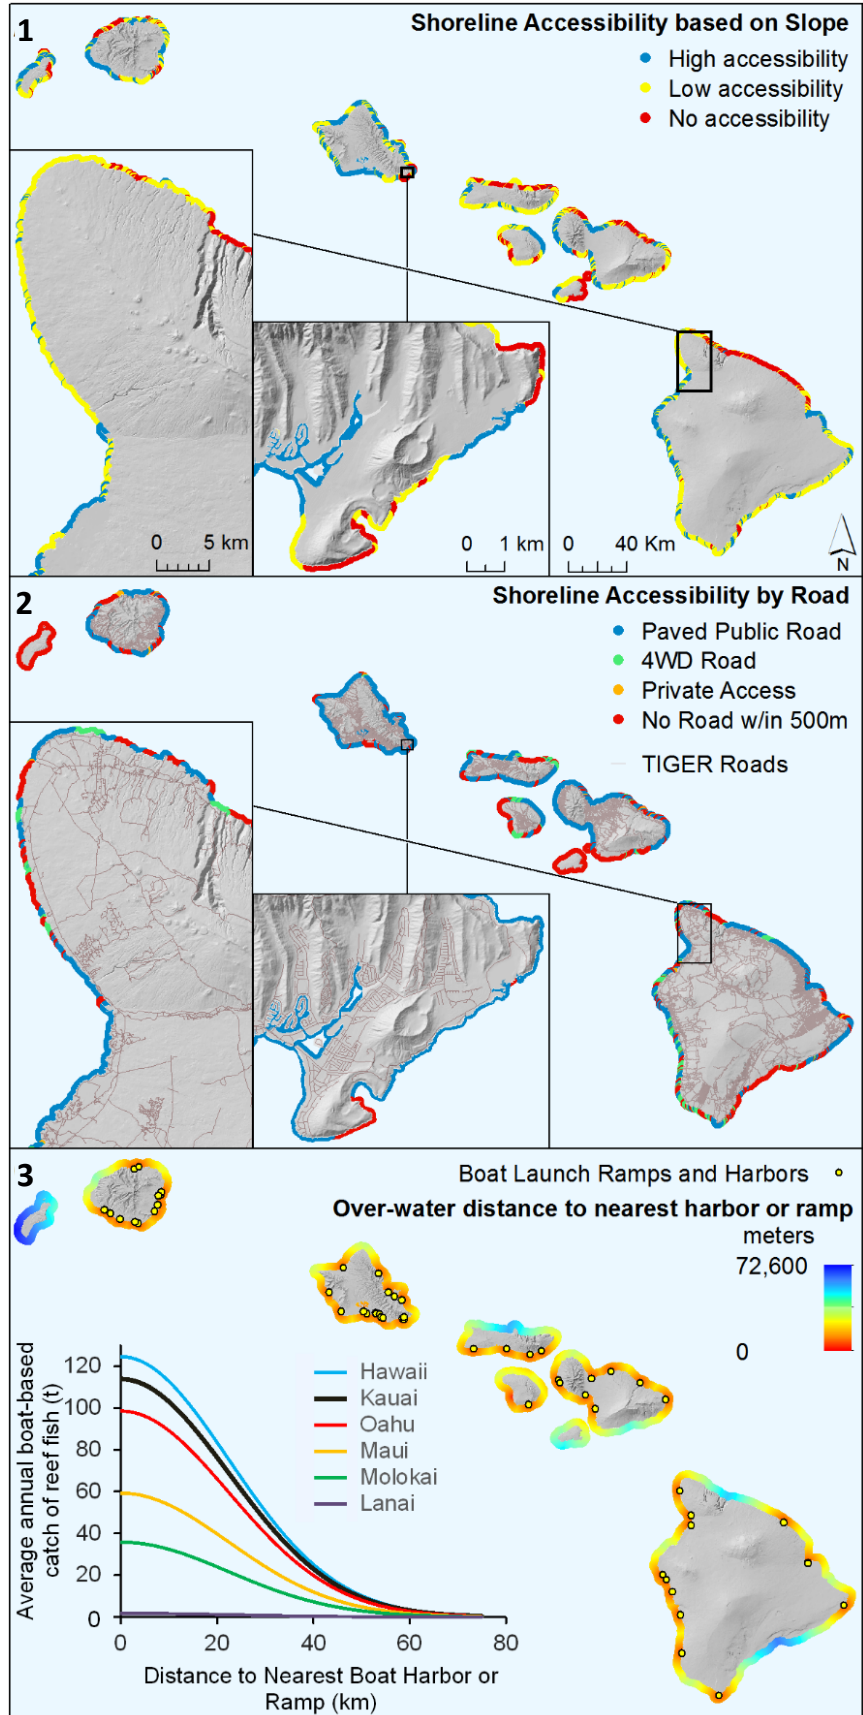

204 **Figure B.** Decay function used to decrease spearfishing catch with depth.  
205

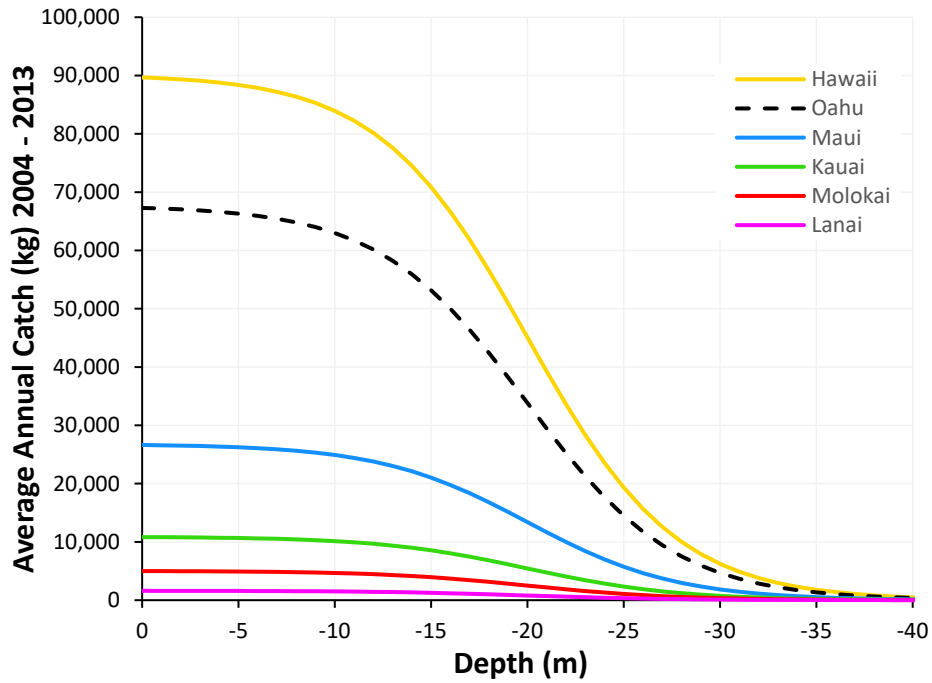

206
